# Supplementary material for: Effect of Apatinib Plus Pegylated Liposomal Doxorubicin vs Pegylated Liposomal Doxorubicin Alone on Platinum-Resistant Recurrent Ovarian Cancer: The APPROVE Randomized Clinical Trial
Source: PubMed Central journal article supplement (PMC9247861; doi:10.1001/jamaoncol.2022.2253), 2022-06-30

## Supplemental Online Content

Wang T, Tang J, Yang H, et al. Effect of apatinib plus pegylated liposomal doxorubicin vs pegylated liposomal doxorubicin alone on platinum-resistant recurrent ovarian cancer: the APPROVE randomized clinical trial. *JAMA Oncol*. Published online June 30, 2022. doi:10.1001/jamaoncol.2022.2253

**eTable 1.** List of 11 participating sites

**eTable 2.** Treatment-emergent adverse events

**eFigure.** Subgroup analyses of progression-free survival

This supplemental material has been provided by the authors to give readers additional information about their work.

**eTable 1. List of 11 participating sites.**

| Site name                                                                                                                                                 | Number of recruited patients |
|-----------------------------------------------------------------------------------------------------------------------------------------------------------|------------------------------|
| National Cancer Center/National Clinical Research Center for Cancer/Cancer Hospital, Chinese Academy of Medical Sciences and Peking Union Medical College | 73                           |
| Hunan Cancer Hospital                                                                                                                                     | 20                           |
| Yunnan Provincial Cancer Center                                                                                                                           | 17                           |
| West China Second University Hospital                                                                                                                     | 12                           |
| Cancer Hospital of China Medical University                                                                                                               | 11                           |
| Chongqing University Cancer Hospital                                                                                                                      | 8                            |
| The First Hospital of Jilin University                                                                                                                    | 5                            |
| Xiangya Hospital                                                                                                                                          | 2                            |
| Guangxi Medical University Affiliated Tumor Hospital                                                                                                      | 2                            |
| The Second Affiliated Hospital of Dalian Medical University                                                                                               | 1                            |
| Hubei Cancer Hospital                                                                                                                                     | 1                            |

**eTable 2. Treatment-emergent adverse events**

| Events, No. (%)           | Apatinib plus PLD group (n = 74) |               |               |             | PLD group (n = 72) |               |               |           |
|---------------------------|----------------------------------|---------------|---------------|-------------|--------------------|---------------|---------------|-----------|
|                           | All Grades                       | Grade 1-2     | Grade 3       | Grade 4     | All Grades         | Grade 1-2     | Grade 3       | Grade 4   |
| Any                       | 69<br>(93.2%)                    | 37<br>(50.0%) | 30<br>(40.5%) | 2<br>(2.7%) | 61<br>(84.7%)      | 47<br>(65.3%) | 14<br>(19.4%) | 0<br>(0%) |
| WBC decrease              | 45<br>(60.8%)                    | 40<br>(54.1%) | 5<br>(6.8%)   | 0<br>(0%)   | 36<br>(50.0)       | 33<br>(45.8%) | 3<br>(4.2%)   | 0<br>(0%) |
| Neutrophil count decrease | 44<br>(59.5%)                    | 33<br>(44.6%) | 11<br>(14.9%) | 0<br>(0%)   | 27<br>(37.5%)      | 21<br>(29.2%) | 6<br>(8.3%)   | 0<br>(0%) |
| Oral ulcer                | 21<br>(28.4%)                    | 20<br>(27.0%) | 1<br>(1.4%)   | 0<br>(0%)   | 9<br>(12.5%)       | 7<br>(9.7%)   | 2<br>(2.8%)   | 0<br>(0%) |
| Hand-foot syndrome        | 19<br>(25.7%)                    | 15<br>(20.3%) | 3<br>(4.1%)   | 1<br>(1.4%) | 2<br>(2.8%)        | 0<br>(0%)     | 2<br>(2.8%)   | 0<br>(0%) |
| Anaemia                   | 16<br>(21.6%)                    | 15<br>(20.3%) | 1<br>(1.4%)   | 0<br>(0%)   | 16<br>(22.2%)      | 13<br>(18.1%) | 3<br>(4.2%)   | 0<br>(0%) |
| Fatigue                   | 15<br>(20.3%)                    | 15<br>(20.3%) | 0<br>(0%)     | 0<br>(0%)   | 8<br>(11.1%)       | 8<br>(11.1%)  | 0<br>(0%)     | 0<br>(0%) |
| Nausea                    | 14<br>(18.9%)                    | 13<br>(17.6%) | 1<br>(1.4%)   | 0<br>(0%)   | 19<br>(26.4%)      | 19<br>(26.4%) | 0<br>(0%)     | 0<br>(0%) |
| Hypertension              | 13<br>(17.6%)                    | 7<br>(9.5%)   | 6<br>(8.1%)   | 0<br>(0%)   | 1<br>(1.4%)        | 1<br>(1.4%)   | 0<br>(0%)     | 0<br>(0%) |
| Oral mucositis            | 12<br>(16.2%)                    | 10<br>(13.5%) | 1<br>(1.4%)   | 1<br>(1.4%) | 6<br>(8.3%)        | 6<br>(8.3%)   | 0<br>(0%)     | 0<br>(0%) |
| Platelet count decrease   | 12<br>(16.2%)                    | 10<br>(13.5%) | 2<br>(2.7%)   | 0<br>(0%)   | 3<br>(4.2%)        | 3<br>(4.2%)   | 0<br>(0%)     | 0<br>(0%) |
| Vomiting                  | 11<br>(14.9%)                    | 11<br>(14.9%) | 0<br>(0%)     | 0<br>(0%)   | 10<br>(13.9%)      | 10<br>(13.9%) | 0<br>(0%)     | 0<br>(0%) |
| AST increase              | 11<br>(14.9%)                    | 11<br>(14.9%) | 0<br>(0%)     | 0<br>(0%)   | 2<br>(2.8%)        | 2<br>(2.8%)   | 0<br>(0%)     | 0<br>(0%) |
| Dizziness                 | 11<br>(14.9%)                    | 10<br>(13.5%) | 1<br>(1.4%)   | 0<br>(0%)   | 2<br>(2.8%)        | 2<br>(2.8%)   | 0<br>(0%)     | 0<br>(0%) |
| Headache                  | 11<br>(14.9%)                    | 10<br>(13.5%) | 1<br>(1.4%)   | 0<br>(0%)   | 3<br>(4.2%)        | 3<br>(4.2%)   | 0<br>(0%)     | 0<br>(0%) |
| Proteinuria               | 11<br>(14.9%)                    | 9<br>(12.2%)  | 2<br>(2.7%)   | 0<br>(0%)   | 2<br>(2.8%)        | 2<br>(2.8%)   | 0<br>(0%)     | 0<br>(0%) |
| Urine leucocyte positive  | 8<br>(10.8%)                     | 8<br>(10.8%)  | 0<br>(0%)     | 0<br>(0%)   | 2<br>(2.8%)        | 2<br>(2.8%)   | 0<br>(0%)     | 0<br>(0%) |

AST, aspartate aminotransferase; PLD, pegylated liposomal doxorubicin; WBC, white blood cell count. Treatment-emergent adverse events occurring in 10% or more of patients in either group are listed.

**eFigure. Subgroup Analyses of Progression-Free Survival.**

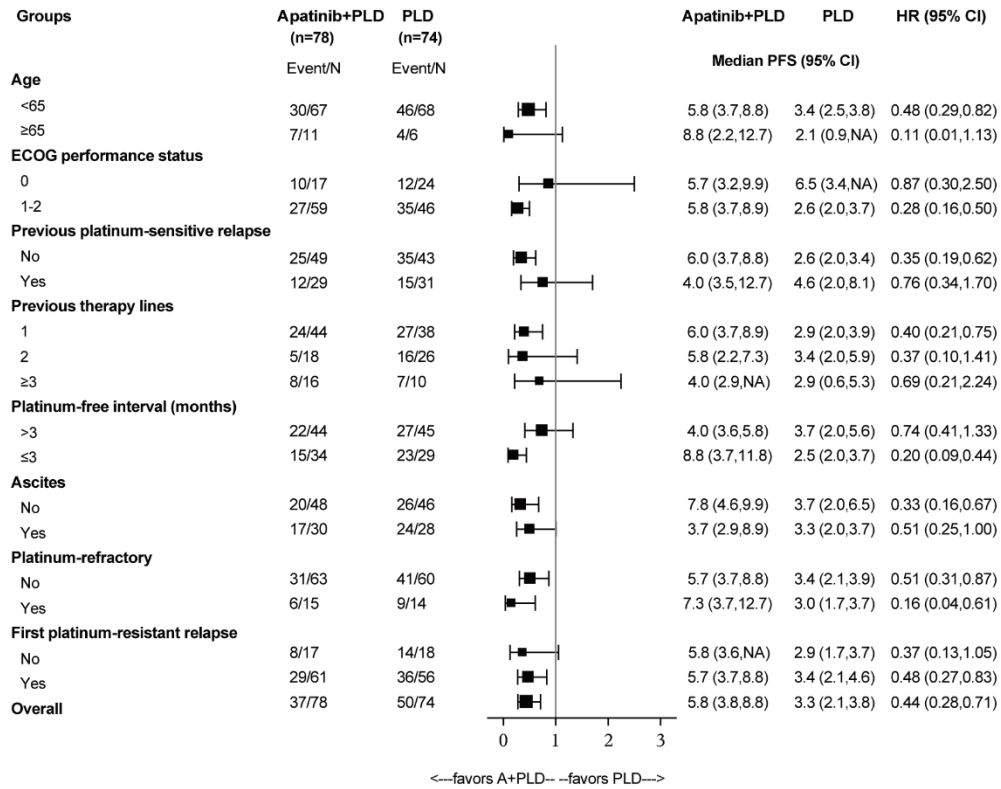

Supplement: jamaoncol-e222253-s003.pdf [file jamaoncol-e222253-s003.pdf]
